# Supplementary material for: Additional obstacles in carbon nanotube growth by gas-flow directed chemical vapour deposition unveiled through improving growth density
Source: Royal Society of Chemistry journal article supplement (doi:10.1039/c9na00209j), 2019-01-01
Supplement: c9na00209j1.pdf [file c9na00209j1.pdf]

Electronic Supplementary Information (ESI) for

**Additional obstacles in carbon nanotube growth by gas-flow directed chemical vapour deposition unveiled through improving growth density**

Takashi Tsuji, Kenji Hata, Don N. Futaba\*, and Shunsuke Sakurai\*

CNT-Application Research Centre, National Institute of Advanced Industrial Science and Technology, Central 5, 1-1-1 Higashi, Tsukuba, Ibaraki, 305-8565, Japan

\*Corresponding author: [d-futaba@aist.go.jp](mailto:d-futaba@aist.go.jp), [shunsuke-sakurai@aist.go.jp](mailto:shunsuke-sakurai@aist.go.jp)

### Supplementary Information 1: Characterization of GO used in this study

Our characterization of the graphene oxide (GO) used in this study indicates that the GO exist as isolated flakes or their aggregates. We performed microscopic (AFM/SEM) and spectroscopic characterization of the graphene flakes to provide the size, shape, and quality of our GO. To characterize the GO, an aqueous dispersion of GO ( $\sim 0.01$  mg/ml) was spin-coated onto a  $\text{SiO}_2/\text{Si}$  substrate. The  $\sim 10$   $\mu\text{m}$  aggregate of the GO flakes and separated flakes of several  $\mu\text{m}$  in size were observed in SEM image (Fig. S1a). The thickness of the GO flakes characterized by AFM images was  $\sim 1$  nm (Fig. S1b)). Raman spectrum of the GO flakes casted on the  $\text{SiO}_2/\text{Si}$  substrate shows G and D bands at  $\sim 1600$  and  $\sim 1350$   $\text{cm}^{-1}$ , respectively, with G/D ratio of  $\sim 1$ , which is the typical feature of GO (Fig. S1c)

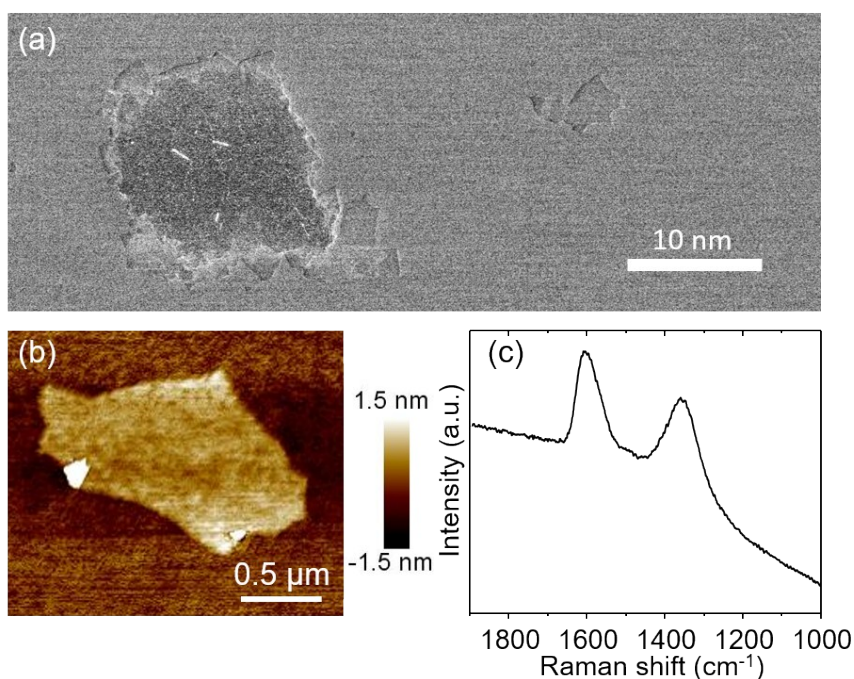

**Figure S1.** (a) SEM and (b) AFM images of GO flakes spin-coated onto a  $\text{SiO}_2/\text{Si}$  substrate. (c) Raman spectrum of GO.

**Supplementary Information 2: CNTs crossing over a trench**

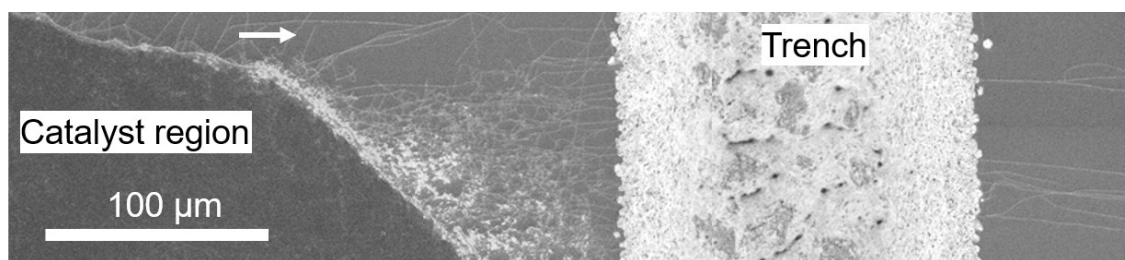

**Figure S2.** SEM image showing the growth of CNTs across a trench (width:  $\sim 100 \mu\text{m}$ , depth:  $\sim 63 \mu\text{m}$ ). The arrow indicates the gas flow direction.

### Supplementary Information 3: Definition and calculation of the delay time

“The delay time” in the manuscript ( $t_{\text{delay}}$ ) was meant to be the time required for the sample to wait on the center of the furnace to contact with carbon source containing gas. Thus, except  $t_{\text{delay}} = 0$  s, where  $\text{CH}_4$  gas was continuously flowing the furnace when the catalyst substrate inserted into the furnace, the delay time was defined as  $t_{\text{delay}} = t_{\text{calib}} + t$ , where  $t$  is the timing of  $\text{CH}_4$  gas valve opening from the moment the sample reaching the center of the furnace, and  $t_{\text{calib}}$  is time required for the  $\text{CH}_4$  gas to reach the catalyst substrate from gas valve.  $t_{\text{calib}}$  was simply calculated as  $t_{\text{calib}} = V / u$ , where  $V$  is the volume of the gas flow path from the valve to the center of the furnace, and  $u$  is the gas flow rate. In this experimental setup,  $V$  was  $170 \text{ cm}^3$  and  $u$  was  $1000 \text{ cm}^3/\text{s}$ . Although a part of  $V$  ( $\sim 70 \text{ cm}^3$ ) was located in a heating zone of the furnace, expansion of the heated gas was neglected in the present calculation.

In the present experiment described in Figure 2,  $t$  of 0, 6, or 30 s was chosen, and thus the calculated  $t_{\text{delay}}$  was 10, 16, 40 s, respectively.

**Supplementary Information 4:** Fe<sub>3</sub>O<sub>4</sub> particles supported on GO flakes

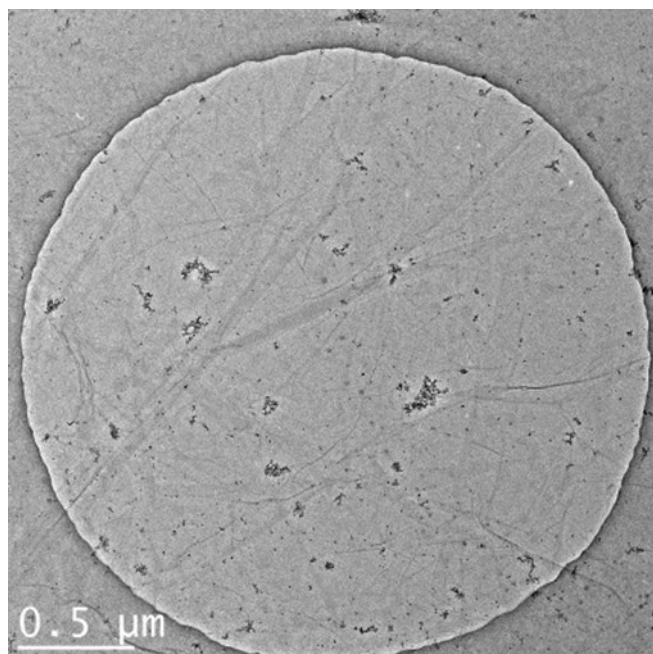

**Figure S3.** Low magnification TEM image of Fe<sub>3</sub>O<sub>4</sub> particles supported on the GO layer covering a 2 μm microporous region of the silicon nitride membrane TEM grid.

**Supplementary Information 5:** Result of CNT growth using neither fast-heating method nor GO support

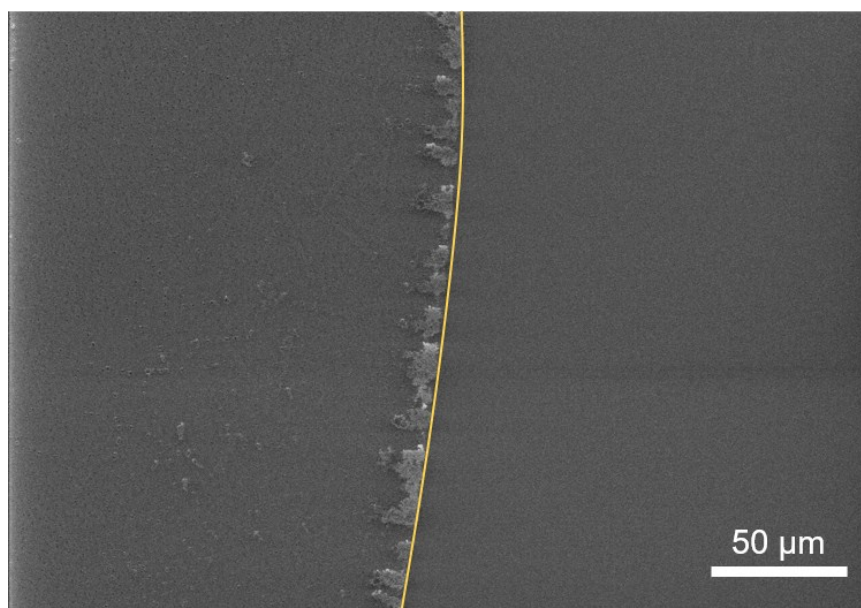

**Figure S4.** SEM image of the  $\text{Fe}_3\text{O}_4$  catalyst coated  $\text{SiO}_2/\text{Si}$  substrate after the CVD process. In this CVD process, carbon source ( $\text{CH}_4$ ) was supplied to the catalyst coated substrate after 40 second  $\text{H}_2$  reduction process (delay time is 40 s). The area to the left side of yellow line is a catalyst region.

**Supplementary Information 6: Effect of  $\text{Fe}_3\text{O}_4/\text{GO}$  ratio on the number density of grown CNTs**

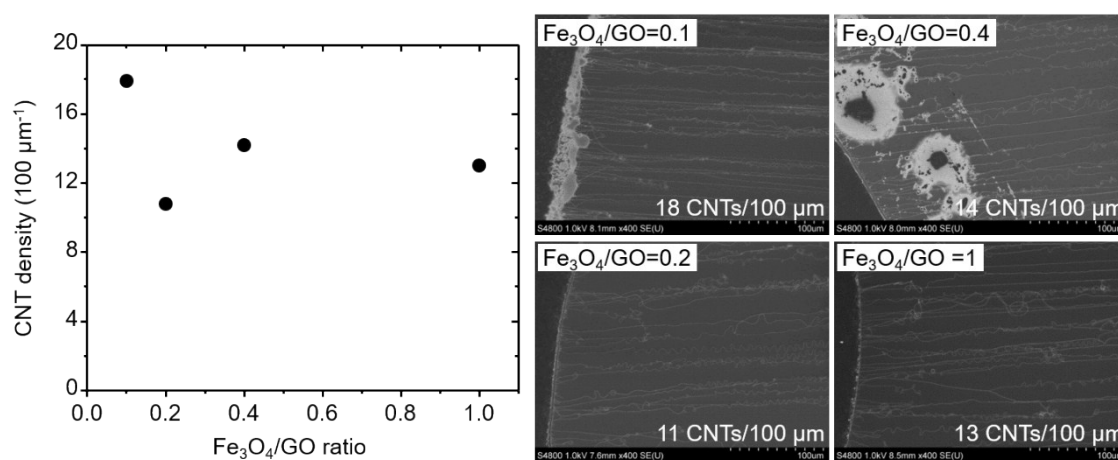

**Figure S5** Number density of CNTs as a function of mass ratio of  $\text{Fe}_3\text{O}_4$  against GO in the catalyst systems.
